# Supplementary material for: The Role of Remnant Cholesterol Beyond Low-Density Lipoprotein Cholesterol in Left Ventricular Hypertrophy among Patients with Diabetes
Source: Research Square preprint supplement (doi:10.21203/rs.3.rs-8266571/v1), 2026-02-11
Supplement: Supplementary file 1 [file 90e76c9f9ebd76ee38f2d575.pdf]

**Table S3.** Association between RC/LDL-C discordance/concordance and LVH in stricter clinical cut-off points

|                                                                   | OR (95%CI)       |                  |                  |
|-------------------------------------------------------------------|------------------|------------------|------------------|
|                                                                   | Model 1          | Model 2          | Model 3          |
| <b>Overall patients</b>                                           |                  |                  |                  |
| RC < 0.44 mmol/L and LDL-C < 1.80 mmol/L<br>(reference)           | 1                | 1                | 1                |
| RC < 0.44 mmol/L and LDL-C > 1.80 mmol/L                          | 0.80 (0.72–0.89) | 0.98 (0.87–1.10) | 0.98 (0.87–1.10) |
| RC > 0.44 mmol/L and LDL-C < 1.80 mmol/L                          | 1.15 (1.02–1.29) | 1.24 (1.09–1.40) | 1.23 (1.09–1.40) |
| RC > 0.44 mmol/L and LDL-C > 1.80 mmol/L                          | 1.01 (0.91–1.12) | 1.21 (1.08–1.35) | 1.21 (1.08–1.35) |
| <b>Patients excluding those taking lipid-lowering medications</b> |                  |                  |                  |
| RC < 0.44 mmol/L and LDL-C < 1.80 mmol/L<br>(reference)           | 1                | 1                | 1                |
| RC < 0.44 mmol/L and LDL-C > 1.80 mmol/L                          | 0.82 (0.73–0.92) | 1.00 (0.88–1.13) | 1.00 (0.88–1.13) |
| RC > 0.44 mmol/L and LDL-C < 1.80 mmol/L                          | 1.17 (1.04–1.33) | 1.25 (1.10–1.43) | 1.25 (1.10–1.43) |
| RC > 0.44 mmol/L and LDL-C > 1.80 mmol/L                          | 1.04 (0.93–1.16) | 1.22 (1.09–1.38) | 1.22 (1.09–1.38) |

**Notes:** ORs were estimated by logistic regression models. Model 1: crude model; Model 2: adjusted for age, gender, BMI, smoking status, history of hypertension, anti-hypertensive medications and HbA1c; Model 3: adjusted for age, gender, BMI, smoking status, history of hypertension, anti-hypertensive medications, HbA1c and hs-CRP.

**Abbreviations:** OR, odds ratio; CI, confidence interval; LDL-C, low-density lipoprotein cholesterol; RC, remnant cholesterol

**Table S4.** Association between RC/LDL-C discordance/concordance and LVH in normolipidemic patients<sup>a</sup>

|                                                                              | OR (95%CI)       |                                                            |
|------------------------------------------------------------------------------|------------------|------------------------------------------------------------|
|                                                                              | Overall patients | Patients excluding those taking lipid-lowering medications |
| <b>The logistic regression analysis with RC.</b>                             |                  |                                                            |
| RC                                                                           | 1.20 (1.03–1.42) | 1.26 (0.99–1.62)                                           |
| <b>The logistic regression with concordant/discordant groups of LDL-C/RC</b> |                  |                                                            |
| Discordantly low RC (reference)                                              | 1                | 1                                                          |
| Discordantly high RC                                                         | 1.34 (1.20–1.50) | 1.32 (1.17–1.48)                                           |
| Concordant                                                                   | 1.23 (1.10–1.37) | 1.20 (1.07–1.35)                                           |
| <b>Regression residual analysis of LDL-C and RC</b>                          |                  |                                                            |
| <b>The logistic regression with RC and the LDL-C residual</b>                |                  |                                                            |
| RC                                                                           | 1.21 (1.03–1.42) | 1.19 (1.01–1.41)                                           |
| LDL-C residual                                                               | 0.90 (0.86–0.95) | 0.91 (0.86–0.95)                                           |
| <b>The logistic regression with LDL-C and the RC residual</b>                |                  |                                                            |
| LDL-C                                                                        | 0.90 (0.85–0.94) | 0.90 (0.86–0.95)                                           |
| RC residual                                                                  | 1.13 (0.96–1.34) | 1.12 (0.95–1.33)                                           |

**Notes:** <sup>a</sup>TG < 1.7 mmol/L and LDL < 2.6 mmol/L. ORs were estimated by logistic regression models. Models were adjusted for age, gender, BMI, smoking status, history of hypertension, anti-hypertensive medications, HbA1c and hs-CRP.

**Abbreviations:** OR, odds ratio; CI, confidence interval; LDL-C, low-density lipoprotein cholesterol; RC, remnant cholesterol

**Table S5.** Association between RC/LDL-C discordance/concordance and LVH in patients  
excluding those taking lipid-lowering medications

|                                                               | OR (95%CI)       |                  |                  |
|---------------------------------------------------------------|------------------|------------------|------------------|
|                                                               | Model 1          | Model 2          | Model 3          |
| <b>RC percentile minus LDL-C percentile</b>                   |                  |                  |                  |
| Discordantly low RC (reference)                               | 1                | 1                | 1                |
| Discordantly high RC                                          | 1.30 (1.23–1.39) | 1.16 (1.09–1.24) | 1.16 (1.09–1.24) |
| Concordant                                                    | 1.18 (1.09–1.27) | 1.08 (1.00–1.17) | 1.08 (1.00–1.17) |
| <b>Cut-offs: LDL-C 2.6 mmol/L, RC 0.62 mmol/L</b>             |                  |                  |                  |
| RC < 0.62 mmol/L and LDL-C < 2.6 mmol/L<br>(reference)        | 1                | 1                | 1                |
| RC < 0.62 mmol/L and LDL-C > 2.6 mmol/L                       | 0.82 (0.76–0.88) | 0.94 (0.87–1.03) | 0.94 (0.87–1.03) |
| RC > 0.62 mmol/L and LDL-C < 2.6 mmol/L                       | 1.13 (1.05–1.22) | 1.17 (1.08–1.26) | 1.17 (1.08–1.26) |
| RC > 0.62 mmol/L and LDL-C > 2.6 mmol/L                       | 1.08 (1.00–1.16) | 1.22 (1.12–1.33) | 1.22 (1.12–1.33) |
| <b>Regression residual analysis of LDL-C and RC</b>           |                  |                  |                  |
| <b>The logistic regression with RC and the LDL-C residual</b> |                  |                  |                  |
| RC                                                            | 1.04 (1.01–1.06) | 1.07 (1.04–1.11) | 1.07 (1.04–1.11) |
| LDL-C residual                                                | 0.95 (0.92–0.97) | 1.02 (0.99–1.06) | 1.02 (0.99–1.06) |
| <b>The logistic regression with LDL-C and the RC residual</b> |                  |                  |                  |
| LDL-C                                                         | 0.94 (0.92–0.97) | 1.01 (0.98–1.04) | 1.01 (0.98–1.04) |
| RC residual                                                   | 1.03 (1.01–1.05) | 1.08 (1.05–1.11) | 1.08 (1.05–1.11) |

**Notes:** ORs were estimated by logistic regression models. Model 1: crude model; Model 2: adjust for age, gender, BMI, smoking status, history of hypertension, anti-hypertensive medications and HbA1c; Model 3: adjust for age, gender, BMI, smoking status, history of hypertension, anti-hypertensive medications, HbA1c and hs-CRP.

**Abbreviations:** OR, odds ratio; CI, confidence interval; LDL-C, low-density lipoprotein cholesterol; RC, remnant cholesterol

**Table S6.** Association of RC and hs-CRP with LVH in patients excluding those taking lipid-lowering medications

|                                                      | OR (95%CI)       |                  | <i>P</i> for interaction |
|------------------------------------------------------|------------------|------------------|--------------------------|
|                                                      | Model 1          | Model 2          |                          |
| <b>Quartiles of RCII</b>                             |                  |                  |                          |
| RCII quartile 1 (reference)                          | 1                | 1                | -                        |
| RCII quartile 2                                      | 1.32 (1.22–1.43) | 1.19 (1.09–1.29) |                          |
| RCII quartile 3                                      | 1.51 (1.40–1.64) | 1.34 (1.23–1.46) |                          |
| RCII quartile 4                                      | 1.46 (1.35–1.58) | 1.39 (1.28–1.52) |                          |
| <b>Cut-offs: RC 0.62mmol/L; hs-CRP 1mg/L, 3 mg/L</b> |                  |                  |                          |
| RC < 0.62 mmol/L and hs-CRP < 1 mg/L (reference)     | 1                | 1                | 0.752                    |
| RC < 0.62 mmol/L and hs-CRP 1-3 mg/L                 | 1.30 (1.18–1.45) | 1.15 (1.03–1.29) |                          |
| RC < 0.62 mmol/L and hs-CRP ≥ 3 mg/L                 | 1.45 (1.32–1.60) | 1.32 (1.19–1.45) |                          |
| RC ≥ 0.62 mmol/L and hs-CRP < 1 mg/L                 | 1.32 (1.18–1.48) | 1.26 (1.12–1.43) |                          |
| RC ≥ 0.62 mmol/L and hs-CRP 1-3 mg/L                 | 1.51 (1.36–1.67) | 1.37 (1.23–1.53) |                          |
| RC ≥ 0.62 mmol/L and hs-CRP ≥ 3 mg/L                 | 1.70 (1.55–1.87) | 1.59 (1.44–1.77) |                          |

**Notes:** ORs were estimated by logistic regression models. Model 1: crude model; Model 2: adjusted for age, gender, BMI, smoking status, history of hypertension, anti-hypertensive medications and HbA1c. The *P* value for interaction was evaluated using the likelihood ratio test.

**Abbreviations:** OR, odds ratio; CI, confidence interval; LDL-C, low-density lipoprotein cholesterol; RC, remnant cholesterol; RCII, remnant cholesterol inflammatory index
