# Supplementary material for: The Role of Remnant Cholesterol Beyond Low-Density Lipoprotein Cholesterol in Left Ventricular Hypertrophy among Patients with Diabetes
Source: Research Square preprint supplement (doi:10.21203/rs.3.rs-8266571/v1), 2026-02-11
Supplement: Supplementary file 1 [file b2fe194e9a143cb1fd0ef7f0.xlsx]

## Sheet: Table S2
Table S2. Association between RC/LDL-C discordance/concordance and LVH in subgroup analyses
	Overall patients		Patients excluding those taking lipid-lowering medications
	OR (95%CI)	P for interaction	OR (95%CI)	P for interaction
RC percentile minus LDL-C percentile
Subgroup: age
Age < 65 years		0.403		0.174
Discordantly low RC (reference)	1		1
Discordantly high RC	1.20 (1.10–1.31)		1.21 (1.10–1.32)
Concordant group	1.11 (0.99–1.24)		1.09 (0.98–1.23)
Age ≥ 65 years
Discordantly low RC	1.28 (1.17–1.41)		1.28 (1.16–1.41)
Discordantly high RC	1.46 (1.34–1.60)		1.43 (1.30–1.57)
Concordant	1.39 (1.24–1.55)		1.37 (1.23–1.54)
Subgroup: gender
Male		0.575		0.637
Discordantly low RC (reference)	1		1
Discordantly high RC	1.14 (1.06–1.23)		1.14 (1.05–1.23)
Concordant	1.09 (0.99–1.20)		1.08 (0.98–1.19)
Female
Discordantly low RC	0.50 (0.45–0.55)		0.50 (0.44–0.55)
Discordantly high RC	0.61 (0.55–0.67)		0.60 (0.54–0.67)
Concordant	0.54 (0.47–0.61)		0.54 (0.47–0.61)
Subgroup: hypertension
No		0.289		0.256
Discordantly low RC (reference)	1		1
Discordantly high RC	1.17 (1.02–1.35)		1.18 (1.02–1.36)
Concordant	1.22 (1.03–1.45)		1.23 (1.03–1.46)
Yes
Discordantly low RC	4.86 (4.34–5.45)		4.97 (4.43–5.59)
Discordantly high RC	5.65 (5.06–6.33)		5.74 (5.12–6.44)
Concordant	5.14 (4.54–5.82)		5.20 (4.58–5.91)
Subgroup: BMI
BMI < 28 kg/m2		0.09		0.146
Discordantly low RC (reference)	1		1
Discordantly high RC	1.17 (1.09–1.26)		1.17 (1.08–1.26)
Concordant	1.08 (0.99–1.18)		1.07 (0.98–1.18)
BMI ≥ 28 kg/m2
Discordantly low RC	1.55 (1.39–1.74)		1.53 (1.37–1.72)
Discordantly high RC	1.80 (1.62–2.00)		1.77 (1.58–1.97)
Concordant	1.73 (1.49–1.99)		1.70 (1.46–1.97)
Subgroup: HbA1c
HbA1c < 7%		0.335		0.45
Discordantly low RC (reference)	1		1
Discordantly high RC	1.11 (1.01–1.21)		1.10 (1.01–1.21)
Concordant	1.03 (0.92–1.15)		1.04 (0.93–1.17)
HbA1c ≥ 7%
Discordantly low RC	0.93 (0.85–1.02)		0.94 (0.85–1.03)
Discordantly high RC	1.15 (1.05–1.25)		1.14 (1.04–1.25)
Concordant	1.08 (0.96–1.20)		1.06 (0.94–1.18)
Cut-offs: LDL-C 2.60 mmol/L, RC 0.62 mmol/L
Subgroup: age
Age < 65 years		0.309		0.229
RC < 0.62 mmol/L and LDL-C < 2.60 mmol/L (reference)	1		1
RC < 0.62 mmol/L and LDL-C > 2.60 mmol/L	0.86 (0.77–0.97)		0.87 (0.77–0.98)
RC > 0.62 mmol/L and LDL-C < 2.60 mmol/L	1.06 (0.95–1.19)		1.08 (0.96–1.21)
RC > 0.62 mmol/L and LDL-C > 2.60 mmol/L	1.10 (0.98–1.24)		1.12 (0.99–1.26)
Ag e ≥ 65 years
RC < 0.62 mmol/L and LDL-C < 2.60 mmol/L	1.17 (1.05–1.30)		1.16 (1.04–1.30)
RC < 0.62 mmol/L and LDL-C > 2.60 mmol/L	1.12 (1.00–1.27)		1.12 (0.99–1.27)
RC > 0.62 mmol/L and LDL-C < 2.60 mmol/L	1.40 (1.25–1.58)		1.39 (1.23–1.57)
RC > 0.62 mmol/L and LDL-C > 2.60 mmol/L	1.43 (1.26–1.62)		1.42 (1.25–1.62)
Subgroup: gender
Male		0.505		0.56
RC < 0.62 mmol/L and LDL-C < 2.60 mmol/L (reference)	1		1
RC < 0.62 mmol/L and LDL-C > 2.60 mmol/L	0.96 (0.88–1.06)		0.97 (0.88–1.07)
RC > 0.62 mmol/L and LDL-C < 2.60 mmol/L	1.14 (1.04–1.25)		1.16 (1.05–1.27)
RC > 0.62 mmol/L and LDL-C > 2.60 mmol/L	1.21 (1.10–1.34)		1.22 (1.11–1.36)
Female
RC < 0.62 mmol/L and LDL-C < 2.60 mmol/L	0.51 (0.45–0.57)		0.51 (0.45–0.58)
RC < 0.62 mmol/L and LDL-C > 2.60 mmol/L	0.45 (0.40–0.51)		0.45 (0.40–0.51)
RC > 0.62 mmol/L and LDL-C < 2.60 mmol/L	0.61 (0.54–0.69)		0.61 (0.54–0.69)
RC > 0.62 mmol/L and LDL-C > 2.60 mmol/L	0.62 (0.54–0.70)		0.62 (0.55–0.71)
Subgroup: hypertension
No		< 0.001		< 0.001
RC < 0.62 mmol/L and LDL-C < 2.60 mmol/L (reference)	1		1
RC < 0.62 mmol/L and LDL-C > 2.60 mmol/L	0.74 (0.62–0.88)		0.74 (0.62–0.88)
RC > 0.62 mmol/L and LDL-C < 2.60 mmol/L	0.81 (0.68–0.97)		0.83 (0.69–0.99)
RC > 0.62 mmol/L and LDL-C > 2.60 mmol/L	0.89 (0.75–1.07)		0.91 (0.76–1.09)
Yes
RC < 0.62 mmol/L and LDL-C < 2.60 mmol/L	3.60 (3.16–4.10)		3.66 (3.20–4.19)
RC < 0.62 mmol/L and LDL-C > 2.60 mmol/L	3.59 (3.15–4.10)		3.68 (3.22–4.22)
RC > 0.62 mmol/L and LDL-C < 2.60 mmol/L	4.55 (4.00–5.19)		4.63 (4.05–5.31)
RC > 0.62 mmol/L and LDL-C > 2.60 mmol/L	4.70 (4.11–5.37)		4.81 (4.20–5.53)
Subgroup: BMI
BMI < 28 kg/m2		0.116		0.169
RC < 0.62 mmol/L and LDL-C < 2.6 mmol/L (reference)	1		1
RC < 0.62 mmol/L and LDL-C > 2.60 mmol/L	0.96 (0.88–1.05)		0.96 (0.88–1.06)
RC > 0.62 mmol/L and LDL-C < 2.60 mmol/L	1.19 (1.09–1.3)		1.19 (1.09–1.31)
RC > 0.62 mmol/L and LDL-C > 2.60 mmol/L	1.22 (1.11–1.34)		1.22 (1.11–1.35)
BMI ≥ 28 kg/m2
RC < 0.62 mmol/L and LDL-C < 2.60 mmol/L	1.58 (1.37–1.81)		1.54 (1.33–1.78)
RC < 0.62 mmol/L and LDL-C > 2.60 mmol/L	1.44 (1.25–1.65)		1.42 (1.23–1.64)
RC > 0.62 mmol/L and LDL-C < 2.60 mmol/L	1.80 (1.58–2.05)		1.77 (1.54–2.02)
RC > 0.62 mmol/L and LDL-C > 2.60 mmol/L	1.97 (1.72–2.25)		1.97 (1.71–2.26)
Subgroup: HbA1c
HbA1c < 7%		0.051		0.106
RC < 0.62 mmol/L and LDL-C < 2.60 mmol/L (reference)	1		1
RC < 0.62 mmol/L and LDL-C > 2.60 mmol/L	1.04 (0.93–1.16)		1.03 (0.92–1.16)
RC > 0.62 mmol/L and LDL-C < 2.60 mmol/L	1.22 (1.09–1.36)		1.22 (1.09–1.37)
RC > 0.62 mmol/L and LDL-C > 2.60 mmol/L	1.27 (1.13–1.43)		1.27 (1.12–1.43)
HbA1c ≥ 7%
RC < 0.62 mmol/L and LDL-C < 2.60 mmol/L	1.11 (1.00–1.23)		1.10 (0.98–1.23)
RC < 0.62 mmol/L and LDL-C > 2.60 mmol/L	0.92 (0.83–1.03)		0.92 (0.82–1.03)
RC > 0.62 mmol/L and LDL-C < 2.60 mmol/L	1.20 (1.08–1.33)		1.19 (1.06–1.33)
RC > 0.62 mmol/L and LDL-C > 2.60 mmol/L	1.23 (1.11–1.38)		1.24 (1.10–1.38)
Notes: ORs were estimated by logistic regression models. Models were adjusted for age, gender, BMI, smoking status, history of hypertension, anti-hypertensive medications, HbA1c and hs-CRP. The P value for interaction was evaluated using the likelihood ratio test. Abbreviations: OR, odds ratio; CI, confidence interval; LDL-C, low-density lipoprotein cholesterol; RC, remnant cholesterol
